# Supplementary material for: Novel Function of Cancer Stem Cell Marker ALDH1A3 in Glioblastoma: Pro-Angiogenesis through Paracrine PAI-1 and IL-8
Source: MDPI journal article supplement (doi:10.3390/cancers15174422), 2023-09-04
Supplement: s1 [file s1]

**Table S1. ANOVA analysis table of mRNA- and protein expression data presented in Figure 1.**

| ANOVA table                 | SS    | DF | MS    | F (DFn, DFd)     | <i>p</i> value   |
|-----------------------------|-------|----|-------|------------------|------------------|
| Figure 1 F_PA1-1            |       |    |       |                  |                  |
| Treatment (between columns) | 1404  | 2  | 702.2 | F (2, 3) = 74.75 | <i>p</i> =0.0028 |
| Residual (within columns)   | 28.18 | 3  | 9.395 |                  |                  |
| Total                       | 1433  | 5  |       |                  |                  |
| Figure 1 F_IL-8             |       |    |       |                  |                  |
| Treatment (between columns) | 2667  | 2  | 1334  | F (2, 3) = 107.9 | <i>p</i> =0.0016 |
| Residual (within columns)   | 37.08 | 3  | 12.36 |                  |                  |
| Total                       | 2704  | 5  |       |                  |                  |
| Figure 1 G_PA1-1            |       |    |       |                  |                  |
| Treatment (between columns) | 14624 | 2  | 7312  | F (2, 6) = 175.1 | <i>p</i> <0.0001 |
| Residual (within columns)   | 250.5 | 6  | 41.75 |                  |                  |
| Total                       | 14875 | 8  |       |                  |                  |
| Figure 1 G_pAKT             |       |    |       |                  |                  |
| Treatment (between columns) | 456   | 2  | 228   | F (2, 6) = 4.413 | <i>p</i> =0.0663 |
| Residual (within columns)   | 310   | 6  | 51.67 |                  |                  |
| Total                       | 766   | 8  |       |                  |                  |
| Figure 1 G_pErk1/2          |       |    |       |                  |                  |
| Treatment (between columns) | 6584  | 2  | 3292  | F (2, 6) = 128.3 | <i>p</i> <0.0001 |
| Residual (within columns)   | 154   | 6  | 25.67 |                  |                  |
| Total                       | 6738  | 8  |       |                  |                  |

**DF:** degrees of freedom; **SS:** sum of squares; **MS:** mean square (=SS/DF); **F:** F distribution value; ***p*:** probability.

**Table S2. ANOVA analysis table of indirect co-culture study data presented in Figure 2.**

| ANOVA table                        | SS      | DF | MS      | F (DFn, DFd)      | p value  |
|------------------------------------|---------|----|---------|-------------------|----------|
| <b>Figure 2A_left panel_U373</b>   |         |    |         |                   |          |
| Treatment (between columns)        | 46190   | 3  | 15397   | F (3, 12) = 157.2 | p<0.0001 |
| Residual (within columns)          | 1175    | 12 | 97.94   |                   |          |
| Total                              | 47366   | 15 |         |                   |          |
| <b>Figure 2A_left panel_LN229</b>  |         |    |         |                   |          |
| Treatment (between columns)        | 136956  | 3  | 45652   | F (3, 12) = 119.4 | p<0.0001 |
| Residual (within columns)          | 4589    | 12 | 382.4   |                   |          |
| Total                              | 141546  | 15 |         |                   |          |
| <b>Figure 2A_right panel_U373</b>  |         |    |         |                   |          |
| Treatment (between columns)        | 3498    | 3  | 1166    | F (3, 12) = 52.88 | p<0.0001 |
| Residual (within columns)          | 264.6   | 12 | 22.05   |                   |          |
| Total                              | 3762    | 15 |         |                   |          |
| <b>Figure 2A_right panel_LN229</b> |         |    |         |                   |          |
| Treatment (between columns)        | 28476   | 3  | 9492    | F (3, 12) = 67.50 | p<0.0001 |
| Residual (within columns)          | 1688    | 12 | 140.6   |                   |          |
| Total                              | 30164   | 15 |         |                   |          |
| <b>Figure 2B_U373</b>              |         |    |         |                   |          |
| Treatment (between columns)        | 10022   | 3  | 3341    | F (3, 12) = 56.77 | p<0.0001 |
| Residual (within columns)          | 706.2   | 12 | 58.85   |                   |          |
| Total                              | 10729   | 15 |         |                   |          |
| <b>Figure 2B_LN229</b>             |         |    |         |                   |          |
| Treatment (between columns)        | 628     | 3  | 209.3   | F (3, 12) = 10.82 | p=0.0010 |
| Residual (within columns)          | 232.1   | 12 | 19.35   |                   |          |
| Total                              | 860.1   | 15 |         |                   |          |
| <b>Figure 2C_U373</b>              |         |    |         |                   |          |
| Treatment (between columns)        | 1812579 | 3  | 604193  | F (3, 36) = 116.7 | p<0.0001 |
| Residual (within columns)          | 186390  | 36 | 5177    |                   |          |
| Total                              | 1998969 | 39 |         |                   |          |
| <b>Figure 2C_LN229</b>             |         |    |         |                   |          |
| Treatment (between columns)        | 296993  | 3  | 98998   | F (3, 36) = 28.63 | p<0.0001 |
| Residual (within columns)          | 124491  | 36 | 3458    |                   |          |
| Total                              | 421484  | 39 |         |                   |          |
| <b>Figure 2D_U373</b>              |         |    |         |                   |          |
| Treatment (between columns)        | 118969  | 3  | 39656   | F (3, 16) = 76.14 | p<0.0001 |
| Residual (within columns)          | 8333    | 16 | 520.8   |                   |          |
| Total                              | 127302  | 19 |         |                   |          |
| <b>Figure 2D_LN229</b>             |         |    |         |                   |          |
| Treatment (between columns)        | 96886   | 3  | 32295   | F (3, 16) = 81.16 | p<0.0001 |
| Residual (within columns)          | 6367    | 16 | 397.9   |                   |          |
| Total                              | 103253  | 19 |         |                   |          |
| <b>Figure 2E_U373</b>              |         |    |         |                   |          |
| Treatment (between columns)        | 3100099 | 3  | 1033366 | F (3, 76) = 172.3 | p<0.0001 |
| Residual (within columns)          | 455870  | 76 | 5998    |                   |          |
| Total                              | 3555970 | 79 |         |                   |          |
| <b>Figure 2E_LN229</b>             |         |    |         |                   |          |
| Treatment (between columns)        | 742447  | 3  | 247482  | F (3, 76) = 349.1 | p<0.0001 |
| Residual (within columns)          | 53885   | 76 | 709     |                   |          |
| Total                              | 796332  | 79 |         |                   |          |

DF: degrees of freedom; SS: sum of squares; MS: mean square (=SS/DF); F: F distribution value; *p*: probability.

**Table S3. ANOVA analysis table of direct co-culture study data presented in Figure 3.**

| <b>ANOVA table</b>          | <b>SS</b> | <b>DF</b> | <b>MS</b> | <b>F (DFn, DFd)</b> | <b>p value</b> |
|-----------------------------|-----------|-----------|-----------|---------------------|----------------|
| <b>Figure 3B_U373</b>       |           |           |           |                     |                |
| Treatment (between columns) | 9062      | 3         | 3021      | F (3, 16) = 25.51   | $p<0.0001$     |
| Residual (within columns)   | 1895      | 16        | 118.4     |                     |                |
| Total                       | 10957     | 19        |           |                     |                |
| <b>Figure 3B_LN229</b>      |           |           |           |                     |                |
| Treatment (between columns) | 4025      | 3         | 1342      | F (3, 16) = 71.31   | $p<0.0001$     |
| Residual (within columns)   | 301.1     | 16        | 18.82     |                     |                |
| Total                       | 4326      | 19        |           |                     |                |
| <b>Figure 3E_U373</b>       |           |           |           |                     |                |
| Treatment (between columns) | 4365      | 3         | 1455      | F (3, 12) = 15.86   | $p=0.0002$     |
| Residual (within columns)   | 1101      | 12        | 91.73     |                     |                |
| Total                       | 5465      | 15        |           |                     |                |
| <b>Figure 3E_LN229</b>      |           |           |           |                     |                |
| Treatment (between columns) | 1302      | 3         | 434       | F (3, 12) = 25.27   | $p<0.0001$     |
| Residual (within columns)   | 206.1     | 12        | 17.18     |                     |                |
| Total                       | 1508      | 15        |           |                     |                |
| <b>Figure 3F_U373</b>       |           |           |           |                     |                |
| Treatment (between columns) | 238348    | 3         | 79449     | F (3, 76) = 81.61   | $p<0.0001$     |
| Residual (within columns)   | 73989     | 76        | 973.5     |                     |                |
| Total                       | 312337    | 79        |           |                     |                |
| <b>Figure 3F_LN229</b>      |           |           |           |                     |                |
| Treatment (between columns) | 37601     | 3         | 12534     | F (3, 76) = 44.27   | $p<0.0001$     |
| Residual (within columns)   | 21516     | 76        | 283.1     |                     |                |
| Total                       | 59116     | 79        |           |                     |                |

**DF: degrees of freedom; SS: sum of squares; MS: mean square (=SS/DF); F: F distribution value; p: probability.**

**Table S4. ANOVA analysis table of *in vivo* study data presented in Figure 4.**

| ANOVA table                 | SS     | DF  | MS    | F (DFn, DFd)       | <i>p</i> value   |
|-----------------------------|--------|-----|-------|--------------------|------------------|
| Figure 4C                   |        |     |       |                    |                  |
| Treatment (between columns) | 35902  | 5   | 7180  | F (5, 156) = 9.792 | <i>p</i> <0.0001 |
| Residual (within columns)   | 114391 | 156 | 733.3 |                    |                  |
| Total                       | 150293 | 161 |       |                    |                  |
| Figure 4D                   |        |     |       |                    |                  |
| Treatment (between columns) | 35724  | 5   | 7145  | F (5, 31) = 16.47  | <i>p</i> <0.0001 |
| Residual (within columns)   | 13447  | 31  | 433.8 |                    |                  |
| Total                       | 49171  | 36  |       |                    |                  |

**DF:** degrees of freedom; **SS:** sum of squares; **MS:** mean square (=SS/DF); **F:** F distribution value; ***p*:** probability.

**Table S5. ANOVA analysis table of HUVEC data presented in Figure S4.**

| ANOVA table                 | SS     | DF | MS    | F (DFn, DFd)      | <i>p</i> value   |
|-----------------------------|--------|----|-------|-------------------|------------------|
| Figure S4A_U373             |        |    |       |                   |                  |
| Treatment (between columns) | 2129   | 3  | 709.8 | F (3, 12) = 16.39 | <i>p</i> =0.0002 |
| Residual (within columns)   | 519.8  | 12 | 43.31 |                   |                  |
| Total                       | 2649   | 15 |       |                   |                  |
| Figure S4A_LN229            |        |    |       |                   |                  |
| Treatment (between columns) | 3142   | 3  | 1047  | F (3, 12) = 37.74 | <i>p</i> <0.0001 |
| Residual (within columns)   | 333    | 12 | 27.75 |                   |                  |
| Total                       | 3475   | 15 |       |                   |                  |
| Figure S4B_U373             |        |    |       |                   |                  |
| Treatment (between columns) | 169416 | 3  | 56472 | F (3, 36) = 45.07 | <i>p</i> <0.0001 |
| Residual (within columns)   | 45107  | 36 | 1253  |                   |                  |
| Total                       | 214523 | 39 |       |                   |                  |
| Figure S4B_LN229            |        |    |       |                   |                  |
| Treatment (between columns) | 11829  | 3  | 3943  | F (3, 36) = 19.05 | <i>p</i> <0.0001 |
| Residual (within columns)   | 7451   | 36 | 207   |                   |                  |
| Total                       | 19279  | 39 |       |                   |                  |
| Figure S4C_U373             |        |    |       |                   |                  |
| Treatment (between columns) | 15993  | 3  | 5331  | F (3, 16) = 8.949 | <i>p</i> =0.0010 |
| Residual (within columns)   | 9531   | 16 | 595.7 |                   |                  |
| Total                       | 25525  | 19 |       |                   |                  |
| Figure S4C_LN229            |        |    |       |                   |                  |
| Treatment (between columns) | 14253  | 3  | 4751  | F (3, 16) = 23.51 | <i>p</i> <0.0001 |
| Residual (within columns)   | 3233   | 16 | 202.1 |                   |                  |
| Total                       | 17486  | 19 |       |                   |                  |

**DF:** degrees of freedom; **SS:** sum of squares; **MS:** mean square (=SS/DF); **F:** F distribution value; *p*: probability.

**Table S6. ANOVA analysis table of synergistic effects data presented in Figure S5.**

| ANOVA table                 | SS    | DF | MS    | F (DFn, DFd)      | <i>p</i> value   |
|-----------------------------|-------|----|-------|-------------------|------------------|
| Figure S5A                  |       |    |       |                   |                  |
| Treatment (between columns) | 4823  | 4  | 1206  | F (4, 15) = 56.40 | <i>p</i> <0.0001 |
| Residual (within columns)   | 320.7 | 15 | 21.38 |                   |                  |
| Total                       | 5143  | 19 |       |                   |                  |
| Figure S5B                  |       |    |       |                   |                  |
| Treatment (between columns) | 54033 | 4  | 13508 | F (4, 15) = 44.83 | <i>p</i> <0.0001 |
| Residual (within columns)   | 4520  | 15 | 301.3 |                   |                  |
| Total                       | 58553 | 19 |       |                   |                  |
| Figure S5C                  |       |    |       |                   |                  |
| Treatment (between columns) | 4652  | 4  | 1163  | F (4, 15) = 40.53 | <i>p</i> <0.0001 |
| Residual (within columns)   | 430.4 | 15 | 28.7  |                   |                  |
| Total                       | 5083  | 19 |       |                   |                  |

**DF:** degrees of freedom; **SS:** sum of squares; **MS:** mean square (=SS/DF); **F:** F distribution value; *p*: probability.

**Table S7. ANOVA analysis table of effect of Tiplaxtinin and Reparixin on EC cultured in evCM data presented in Figure S6.**

| ANOVA table                         | SS    | DF | MS    | F (DFn, DFd)        | <i>p</i> value   |
|-------------------------------------|-------|----|-------|---------------------|------------------|
| <b>Figure S6A_left panel_U373</b>   |       |    |       |                     |                  |
| Treatment (between columns)         | 192.3 | 2  | 96.17 | F (2, 9) = 3.973    | <i>p</i> =0.0580 |
| Residual (within columns)           | 217.8 | 9  | 24.2  |                     |                  |
| Total                               | 410.2 | 11 |       |                     |                  |
| <b>Figure S6A_left panel_LN229</b>  |       |    |       |                     |                  |
| Treatment (between columns)         | 146.1 | 2  | 73.07 | F (2, 9) = 3.862    | <i>p</i> =0.0615 |
| Residual (within columns)           | 170.3 | 9  | 18.92 |                     |                  |
| Total                               | 316.4 | 11 |       |                     |                  |
| <b>Figure S6A_right panel_U373</b>  |       |    |       |                     |                  |
| Treatment (between columns)         | 52.53 | 2  | 26.27 | F (2, 9) = 0.4928   | <i>p</i> =0.6265 |
| Residual (within columns)           | 479.7 | 9  | 53.3  |                     |                  |
| Total                               | 532.2 | 11 |       |                     |                  |
| <b>Figure S6A_right panel_LN229</b> |       |    |       |                     |                  |
| Treatment (between columns)         | 400.3 | 2  | 200.2 | F (2, 9) = 2.927    | <i>p</i> =0.1049 |
| Residual (within columns)           | 615.5 | 9  | 68.38 |                     |                  |
| Total                               | 1016  | 11 |       |                     |                  |
| <b>Figure S6B_U373</b>              |       |    |       |                     |                  |
| Treatment (between columns)         | 16.99 | 2  | 8.493 | F (2, 9) = 0.06785  | <i>p</i> =0.9349 |
| Residual (within columns)           | 1127  | 9  | 125.2 |                     |                  |
| Total                               | 1144  | 11 |       |                     |                  |
| <b>Figure S6B_LN229</b>             |       |    |       |                     |                  |
| Treatment (between columns)         | 61.04 | 2  | 30.52 | F (2, 9) = 1.005    | <i>p</i> =0.4037 |
| Residual (within columns)           | 273.3 | 9  | 30.37 |                     |                  |
| Total                               | 334.3 | 11 |       |                     |                  |
| <b>Figure S6C_U373</b>              |       |    |       |                     |                  |
| Treatment (between columns)         | 290.9 | 2  | 145.4 | F (2, 27) = 0.1993  | <i>p</i> =0.8205 |
| Residual (within columns)           | 19704 | 27 | 729.8 |                     |                  |
| Total                               | 19995 | 29 |       |                     |                  |
| <b>Figure S6C_LN229</b>             |       |    |       |                     |                  |
| Treatment (between columns)         | 160.1 | 2  | 80.03 | F (2, 27) = 0.2650  | <i>p</i> =0.7692 |
| Residual (within columns)           | 8154  | 27 | 302   |                     |                  |
| Total                               | 8314  | 29 |       |                     |                  |
| <b>Figure S6D_U373</b>              |       |    |       |                     |                  |
| Treatment (between columns)         | 396.2 | 2  | 198.1 | F (2, 12) = 0.4023  | <i>p</i> =0.6775 |
| Residual (within columns)           | 5909  | 12 | 492.4 |                     |                  |
| Total                               | 6305  | 14 |       |                     |                  |
| <b>Figure S6D_LN229</b>             |       |    |       |                     |                  |
| Treatment (between columns)         | 46.16 | 2  | 23.08 | F (2, 12) = 0.05547 | <i>p</i> =0.9463 |
| Residual (within columns)           | 4993  | 12 | 416.1 |                     |                  |
| Total                               | 5039  | 14 |       |                     |                  |

**DF:** degrees of freedom; **SS:** sum of squares; **MS:** mean square (=SS/DF); **F:** F distribution value; **p:** probability.

**A**

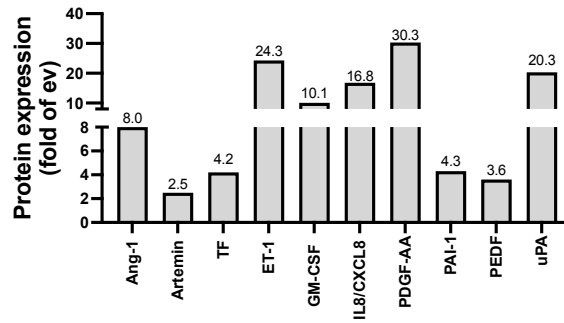

**B**

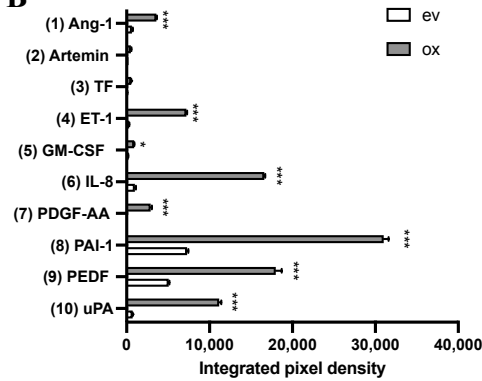

**Figure S1. Semi-quantification of the blots of angiogenesis array. (A)** The fold change of protein expression of 10 upregulated ( $\geq 2$ -fold) angiogenesis-related proteins. **(B)** The abundance of 10 upregulated proteins by integrated pixel density. PAI-1 and IL-8 showed the most abundant among all upregulated proteins. \*,  $p < 0.05$ ; \*\*\*,  $p < 0.001$ , compared with ev.



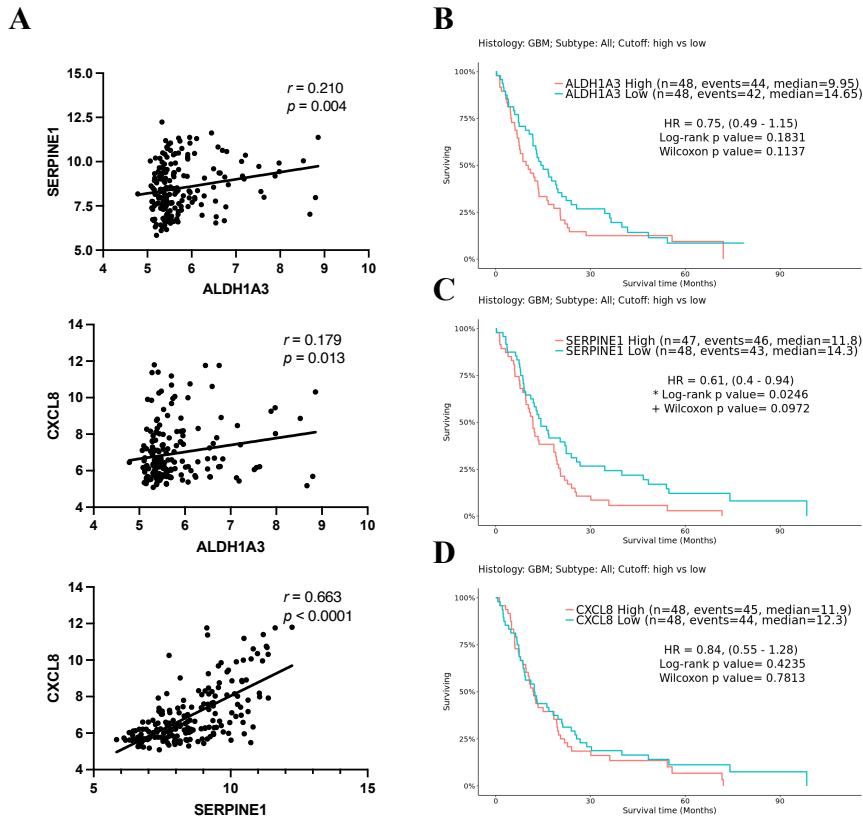

**Figure S2. The expression of ALDH1A3, PAI-1 and IL-8 are associated with poor prognosis in GBM. (A)** Correlation among ALDH1A3, SERPINE1 (PAI-1) and CXCL8 (IL-8) using the LeeY dataset from GlioVis. Pearson correlation was employed. **(B-D)** Kaplan-Meier survival curve of ALDH1A3 **(B)**, SERPINE1 **(C)** and CXCL8 **(D)** with optimal cutoff for high vs low expression. A higher expression of ALDH1A3, SERPINE1 and CXCL8 were associated with a shorter OS time. All data were downloaded from GlioVis.

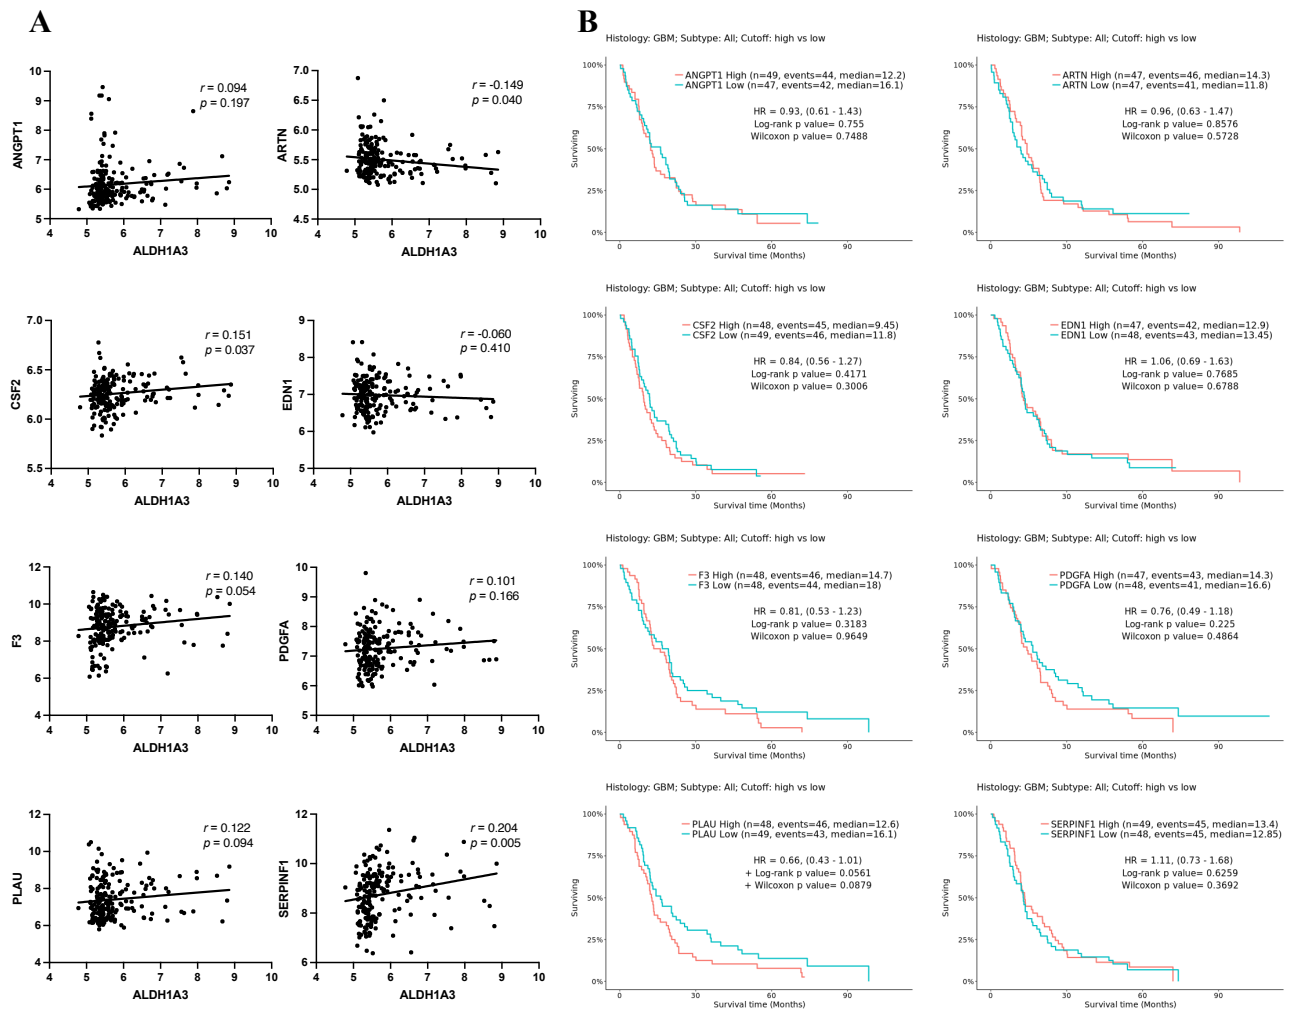

**Figure S3. The expression and survival correlations of ALDH1A3 and angiogenesis factors in GBM. (A)** Expression correlation between ALDH1A3 and ANGPT1 (Ang-1), ARTN (artemin), CSF2 (GM-CSF), EDN1 (ET-1), F3 (TF), PDGFA (PDGFAA), PLAU (uPA) and SERPINF1 (PEDF) in the LeeY dataset from Gliovis. Pearson correlation was employed. **(B)** Kaplan-Meier survival curve of each gene in (A) with optimal cutoff for high vs low expression. All data were downloaded from Gliovis.

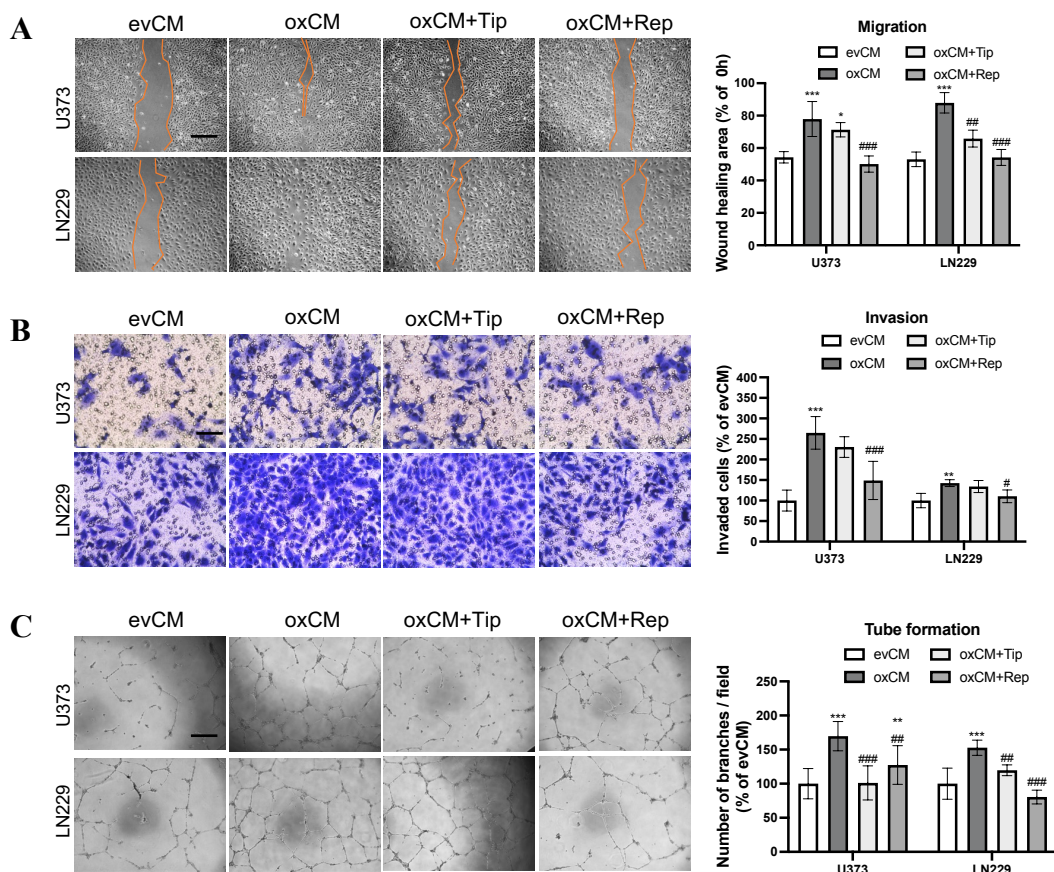

**Figure S4. Indirect co-culture study of oxGBMs with HUVECs.** Indirect co-culture was performed by culture of HUVEC in a conditioned medium (CM) containing the media derived from evGBM or oxGBM cells and ECGM in a ratio of 1:1. Tiplaxtinin (Tip, 30  $\mu$ M) and Reparixin (Rep, 1  $\mu$ M) or vehicle DMSO (0.1%) was added to CM followed by EC behavior study. All data were reproduced in three independent experiments. **(A) Scratch assay in HUVECs.** Left panel: images were acquired 24 h after scratching. Scale bar: 200  $\mu$ m. Right panel: quantitative analysis. Culture of HUVEC with oxCM significantly promoted HUVEC migration, which was reversed by the treatment of Tiplaxtinin and Reparixin, respectively. **(B) Transwell invasion assay in HUVECs.** Left panel: Representative images of invaded cells were acquired after 24 h of incubation. Scale bar: 100  $\mu$ m. Right panel: quantitative analysis. Culture of HUVEC with oxCM accelerated HUVEC invasion. This effect was significantly inhibited by the treatment of Reparixin but not by Tiplaxtinin. **(C) Tube formation assay in HUVECs.** Left panel: representative images of tube formation. Scale bar: 200  $\mu$ m. Right panel: quantitative analysis of branching points per field. Tube formation in HUVEC was stimulated by the incubation with oxCM, which was completely diminished by both inhibitors. \*,  $p < 0.05$ ; \*\*,  $p < 0.01$  and \*\*\*,  $p < 0.001$ , compared with evCM. #,  $p < 0.05$ ; ##,  $p < 0.01$  and ###,  $p < 0.001$ , compared with oxCM.

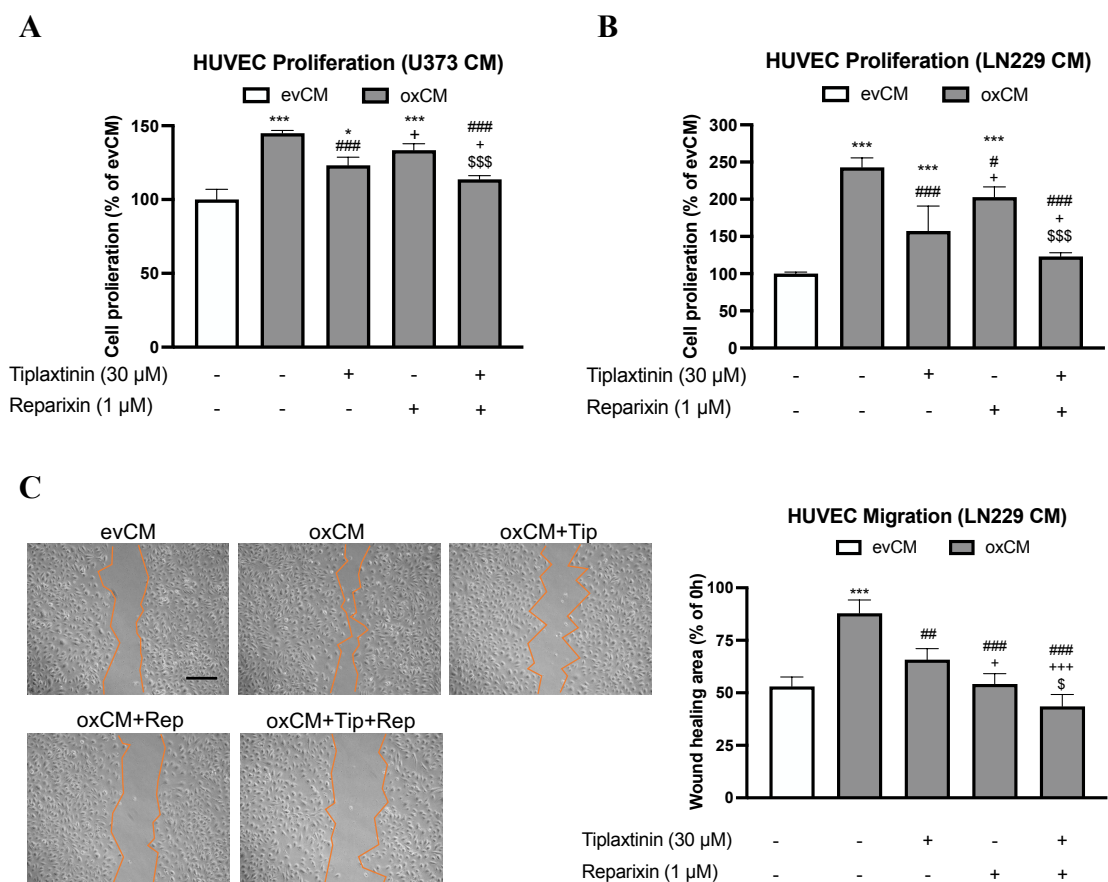

**Figure S5. Synergistic effects of Tiplaxtinin and Reparixin on proliferation and migration of HUVECs in indirect co-culture model.** Indirect co-culture was performed by culture of HUVEC in a conditioned medium (CM) containing the media derived from evGBM or oxGBM cells and ECGM in a ratio of 1:1. Tiplaxtinin (Tip, 30  $\mu$ M) and Reparixin (Rep, 1  $\mu$ M) or vehicle DMSO (0.1%) was added to CM followed by EC behavior study. **(A, B) Proliferation assay of HUVEC.** The combination of both inhibitors led to a stronger inhibition of proliferation in HUVECs treated with oxCM of U373 (A) and LN229 (B) respectively. **(C) Scratch assay in HUVECs.** Left panel: images were acquired 24 h after scratching. Scale bar: 200  $\mu$ m. Right panel: quantitative analysis. The concurrent use of both inhibitors resulted in synergistic inhibition of migration in HUVECs treated with oxCM of LN229. \*,  $p < 0.05$  and \*\*\*,  $p < 0.001$ , compared with evCM. #,  $p < 0.05$ ; ##,  $p < 0.01$  and ###,  $p < 0.001$ , compared with oxCM. +,  $p < 0.05$  and +++,  $p < 0.001$  compared with oxCM+Tip. \$,  $p < 0.05$  and \$\$\$,  $p < 0.001$ , compared with oxCM+Rep.

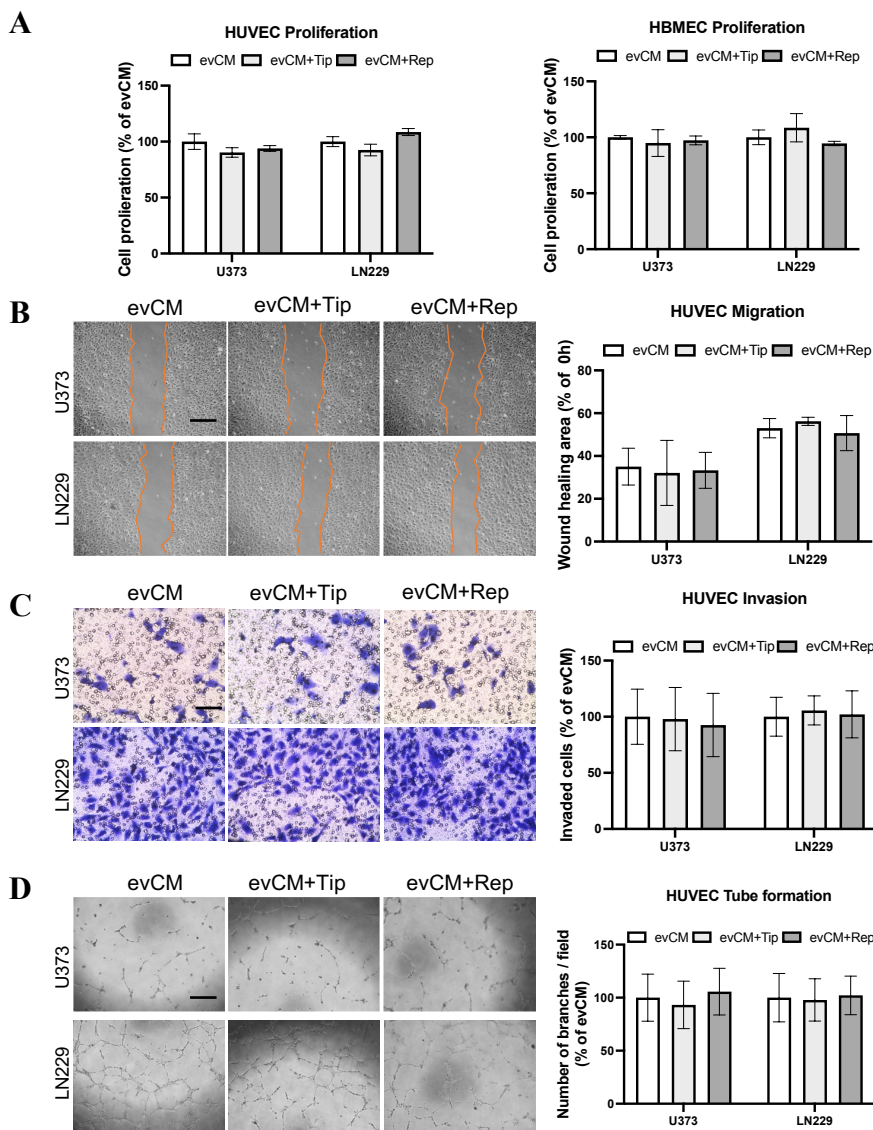

**Figure S6. Effect of Tiplaxtinin and Reparixin on EC cultured in evCM.** Indirect co-culture was performed by culture of ECs in a conditioned medium (CM) containing the media derived from evGBM cells and ECGM in a ratio of 1:1. Tiplaxtinin (Tip, 30  $\mu$ M) and Reparixin (Rep, 1  $\mu$ M) or vehicle DMSO (0.1%) was added to CM followed by EC behavior study. All data were reproduced in three independent experiments. **(A) Proliferation assay in HBMEC and HUVEC.** Tiplaxtinin and Reparixin did not alter the proliferation of evCM treated ECs. **(B) Scratch assay in HUVECs.** Left panel: images were acquired 24 h after scratching. Scale bar: 200  $\mu$ m. Right panel: quantitative analysis. The migration of HUVECs treated with evCM remained unaffected by Tiplaxtinin and Reparixin. **(C) Transwell invasion assay in HUVECs.** Left panel: Representative images of invaded cells were acquired after 24 h of incubation. Scale bar: 100  $\mu$ m. Right panel: quantitative analysis. Tiplaxtinin and Reparixin had no effect on the invasion of evCM treated ECs. **(D) Tube formation assay in HUVECs.** Left panel: representative images of tube formation. Scale bar: 200  $\mu$ m. Right panel: quantitative analysis of branching points per field.

## A. U373

a.

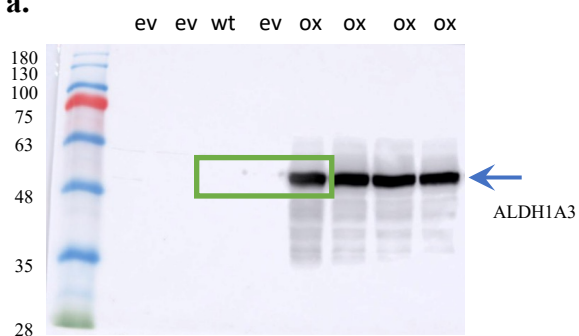

b.

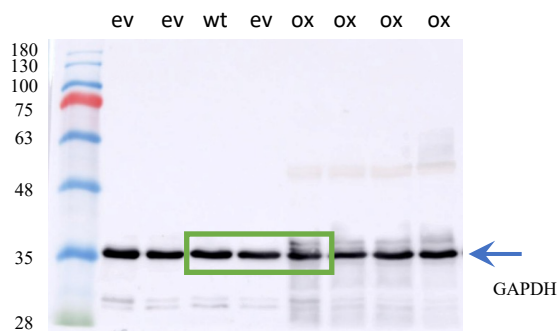

## B. LN229

a.

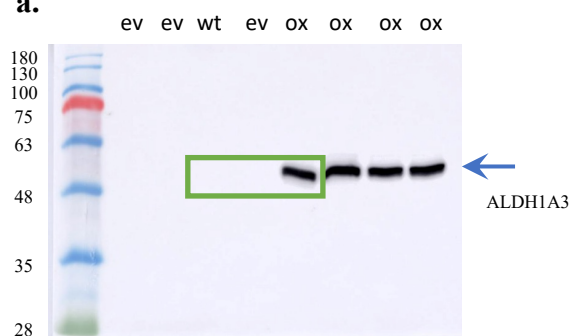

b.

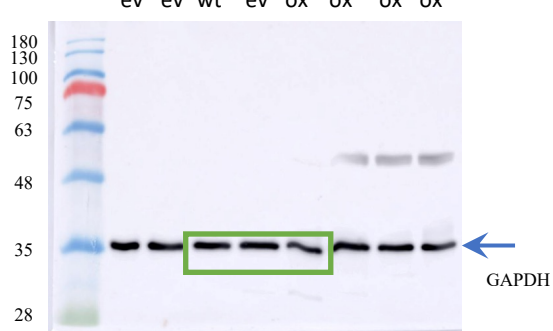

**Figure S7.** Original immunoblots for Figure 1B. U373 (**A**) and LN229 (**B**). The blots shown in Figure 1B for ALDH1A3 (a) and GAPDH (b) were marked in boxes. Others were from different passages of cells, whose data were not included in Figure 1B.



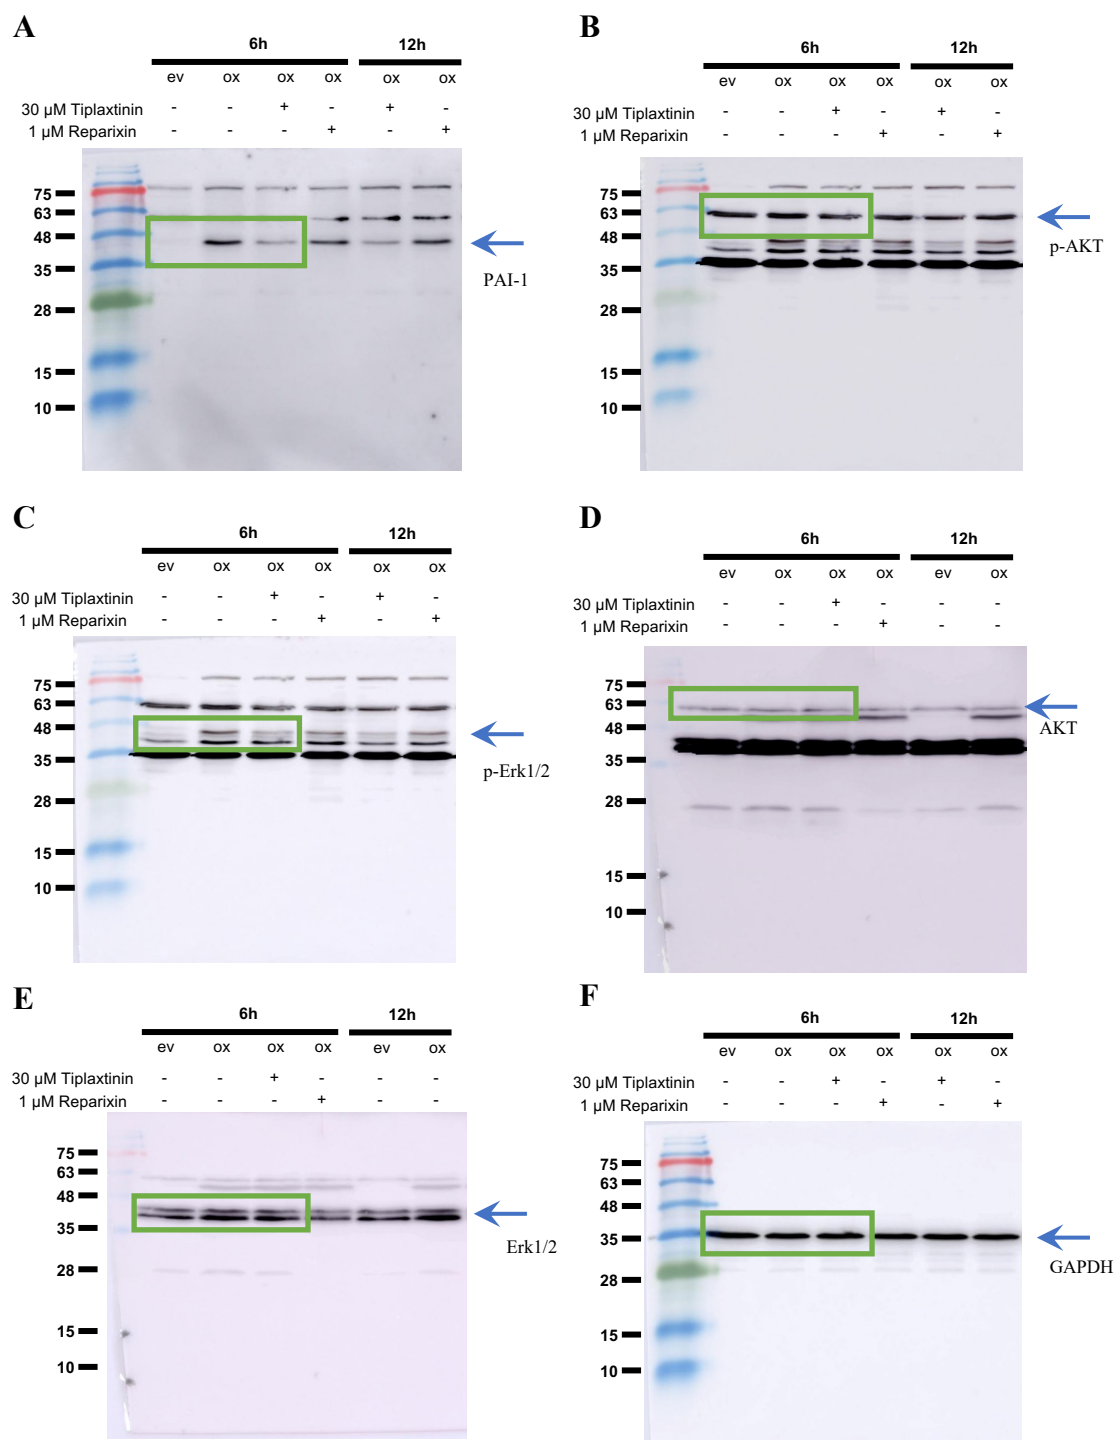

**Figure S8.** Original immunoblots for Figure 1F. U373 cells were collected after 6 h treatment of Tiplaxtinin (30  $\mu$ M) for western blot. Another subset of cells was from different time points and the treatment of Reparixin (1  $\mu$ M), whose data were not included in Figure 1F. The blots shown in Figure 1F for PAI-1 (**A**), p-AKT (**B**), p-Erk1/2 (**C**), AKT (**D**), Erk1/2 (**E**), GAPDH (**F**) were marked in boxes.
